# Supplementary material for: Hyper-Activation of STAT3 Sustains Progression of Non-Papillary Basal-Type Bladder Cancer via FOSL1 Regulome
Source: MDPI journal article supplement (doi:10.3390/cancers11091219), 2019-08-21
Supplement: s1 [file s1]

## Supplementary File 2

# Hyper-activation of STAT3 sustains progression of non-papillary basal-type bladder cancer via FOSL1 regulome

Luisa Benerini Gatta <sup>1,2,3,†</sup>, Laura Melocchi <sup>4,†</sup>, Mattia Bugatti <sup>1,3</sup>, Francesco Missale <sup>5</sup>,  
Silvia Lonardi <sup>1,3</sup>, Benedetta Zanetti <sup>1,3</sup>, Luca Cristinelli <sup>2,3</sup>, Sandra Belotti <sup>2,3</sup>, Claudio Simeone <sup>2,3</sup>, Roberto  
Ronca <sup>1</sup>, Elisabetta Grillo <sup>1</sup>, Sara Licini <sup>1,3</sup>, Debora Bresciani <sup>1,3</sup>, Regina Tardanico <sup>1,3</sup>, Szeman Ruby Chan <sup>6</sup>,  
Emanuele Giurisato <sup>7,8</sup>, Stefano Calza <sup>1,†</sup> and William Vermi <sup>1,3,9,\*</sup>

### Supplementary Tables

**Supplementary Table S1** reports the details of the clinical and pathological features of UBC patients and correlation with pSTAT3 expression.

**Supplementary Table S2** reports the details of the patients characteristics of MIBCs (retrospective UBC cohort).

**Supplementary Table S3** reports the details of the immunohistochemistry scores of basal and luminal markers on MIBCs (retrospective UBC cohort).

**Supplementary Table S4** reports the details of the patients characteristics and pSTAT3 score of NMIBCs (retrospective UBC cohort).

**Supplementary Table S5** reports the details of the TaqMan™ Gene Expression Assays.

**Supplementary Table S6** illustrates the data from gene expression profile of STAT3-regulated transcripts in human UBC cell lines.

**Supplementary Table S7** reports the details of the coefficients for classification using elastic-net (STAT3 signature, TCGA dataset).

**Supplementary Table S8** reports the details of the Hazard Ratios (HR) for univariate Cox models testing overall survival (STAT3 signature, TCGA dataset).

**Supplementary Table S9** reports the details of the Fold Change (FC) for Luminal *vs* Basal comparison in FOSL1 signature (TCGA dataset and GSE32894 dataset).

**Supplementary Table S10** reports the details of the Fold Change (FC) for MIBCs *vs* NMIBCs comparison in FOSL1 signature (GSE32894 dataset).

**Supplementary Table S11** reports the details of the coefficients for MIBCs *vs* NMIBCs classification using FOSL1 signature (GSE32894 dataset).

**Supplementary Table S12** reports the details of antibodies used for immunohistochemistry and western blotting.

**Supplementary Table S1. Clinical and pathological features of UBC patients and correlation with pSTAT3 expression**

| Patient characteristics |                     |           | pSTAT3 Low | pSTAT3 High |          |
|-------------------------|---------------------|-----------|------------|-------------|----------|
|                         |                     | n. (%)    | n. (%)     | n. (%)      | p value  |
| <b>All</b>              |                     | 193 (100) | 119 (62)   | 74 (38)     |          |
| <b>Gender</b>           |                     |           |            |             | 0,173    |
|                         | <b>Male</b>         | 159 (82)  | 102 (64)   | 57 (36)     |          |
|                         | <b>Female</b>       | 34 (18)   | 17 (50)    | 17 (50)     |          |
| <b>Age</b>              |                     |           |            |             | 0,4582   |
|                         | <b>≥ Median</b>     | 104 (54)  | 67 (64)    | 37 (36)     |          |
|                         | <b>≤ Median</b>     | 89 (46)   | 52 (58)    | 37 (42)     |          |
| <b>Histology (TURB)</b> |                     |           |            |             | 0,0019*  |
|                         | <b>LGPBC</b>        | 25 (13)   | 22 (88)    | 3 (12)      |          |
|                         | <b>NMIBC</b>        | 79 (41)   | 52 (66)    | 27 (34)     |          |
|                         | <b>MIBC</b>         | 89 (46)   | 45 (51)    | 44 (49)     |          |
| <b>pT stage</b>         |                     |           |            |             | 0,0007*  |
|                         | <b>pTa-Tis</b>      | 53 (27)   | 43 (36)    | 10 (14)     |          |
|                         | <b>pT1</b>          | 51 (26)   | 31 (26)    | 20 (27)     |          |
|                         | <b>pT2</b>          | 28 (15)   | 10 (8)     | 18 (24)     |          |
|                         | <b>pT3-T4</b>       | 61 (32)   | 35 (29)    | 26 (35)     |          |
| <b>N stage</b>          |                     |           |            |             | 1,0      |
|                         | <b>N0</b>           | 164 (85)  | 101 (62)   | 63 (38)     |          |
|                         | <b>N+</b>           | 29 (15)   | 18 (62)    | 11 (38)     |          |
| <b>AJCC stage</b>       |                     |           |            |             | 0,0014*  |
|                         | <b>Stage 0</b>      | 53 (27)   | 43 (36)    | 10 (14)     |          |
|                         | <b>Stage I</b>      | 51 (26)   | 31 (26)    | 20 (27)     |          |
|                         | <b>Stage II</b>     | 24 (12)   | 9 (8)      | 15 (20)     |          |
|                         | <b>Stage III-IV</b> | 65 (34)   | 36 (30)    | 29 (39)     |          |
| <b>Grading (NMIBC)</b>  |                     |           |            |             | 0,0036*  |
|                         | <b>High Grade</b>   | 79 (76)   | 97 (58)    | 71 (42)     |          |
|                         | <b>Low Grade</b>    | 25 (24)   | 22 (88)    | 3 (12)      |          |
| <b>Early stage</b>      |                     |           |            |             | 0,0184*  |
|                         | <b>Ta-Tis</b>       | 53 (51)   | 44 (81)    | 10 (19)     |          |
|                         | <b>T1</b>           | 51 (49)   | 30 (60)    | 20 (40)     |          |
| <b>Subtype (MIBC)</b>   |                     |           |            |             | < 0,0001 |
|                         | <b>Luminal</b>      | 42 (47)   | 31 (74)    | 11 (26)     |          |
|                         | <b>Basal</b>        | 22 (25)   | 3 (14)     | 19 (86)     |          |
|                         | <b>Non Type</b>     | 25 (28)   | 11 (44)    | 14 (56)     |          |
| <b>CIS concomitant</b>  |                     |           |            |             | 0,3787   |
|                         | <b>No</b>           | 94 (49)   | 61 (65)    | 33 (35)     |          |
|                         | <b>Yes</b>          | 99 (51)   | 58 (59)    | 41 (41)     |          |

TURB: Trans-urethral resection biopsy

pT stage: pathological staging on following cystectomy if performed

LGPBC: Low grade papillary urothelial bladder cancer

NMIBC: Non-muscle invasive bladder cancer

MIBC: Muscle invasive bladder cancer

CIS: Carcinoma in situ.

**Supplementary Table S2. Patients characteristics of MIBC (retrospective UBC cohort).**

| Case | G | Age | D  | pTN     | AJCC | CP | Grade | CIS | Divergent Differentiation   |
|------|---|-----|----|---------|------|----|-------|-----|-----------------------------|
| #1   | M | 51  | N  | pT2a N0 | II   | N  | HG    | N   | SCC, sarcomatoid            |
| #2   | M | 68  | Y  | pT2b N0 | II   | N  | HG    | N   | SCC, sarcomatoid            |
| #3   | M | 82  | Y  | pT4 N0  | III  | N  | HG    | N   | Sarcomatoid                 |
| #4   | M | 73  | N  | pT3b N0 | III  | Y  | HG    | N   | SCC                         |
| #5   | M | 68  | N  | pT3b N1 | IV   | N  | HG    | Y   | N                           |
| #6   | M | 57  | N  | pT2b N0 | II   | N  | HG    | Y   | SCC                         |
| #7   | M | 52  | N  | pT2b N0 | II   | N  | HG    | N   | Glandular                   |
| #8   | M | 78  | N  | pT3a N0 | III  | N  | HG    | Y   | Sarcomatoid                 |
| #9   | M | 73  | N  | pT3a N0 | III  | N  | HG    | Y   | Sarcomatoid, glandular      |
| #10  | F | 54  | N  | pT2b N0 | II   | N  | HG    | Y   | N                           |
| #11  | M | 78  | N  | pT3a N0 | III  | N  | HG    | Y   | SCC                         |
| #12  | F | 70  | N  | pT2b N0 | II   | N  | HG    | Y   | Micropapillary              |
| #13  | M | 51  | N  | pT2b N0 | II   | N  | HG    | Y   | SCC, sarcomatoid            |
| #14  | M | 61  | N  | pT2 N0  | II   | N  | HG    | Y   | SCC                         |
| #15  | M | 69  | N  | pT2b N0 | II   | N  | HG    | N   | SCC, micropapillary         |
| #16  | M | 71  | N  | pT3 N0  | III  | N  | HG    | N   | SCC, micropapillary,        |
| #17  | M | 76  | N  | pT3a N0 | III  | N  | HG    | Y   | Micropapillary              |
| #18  | M | 56  | N  | pT3a N0 | III  | N  | HG    | N   | Nested                      |
| #19  | M | 65  | N  | pT4a N0 | III  | N  | HG    | Y   | N                           |
| #20  | M | 69  | Y  | pT4 N0  | III  | Y  | HG    | N   | SCC                         |
| #21  | M | 73  | Y  | pT3b N2 | IV   | Y  | HG    | Y   | Sarcomatoid, glandular, NE  |
| #22  | F | 90  | Y  | pT2b N0 | II   | N  | HG    | N   | N                           |
| #23  | M | 57  | Y  | pT3a N0 | III  | Y  | HG    | N   | Glandular                   |
| #24  | M | 75  | N  | pT3a N1 | IV   | Y  | HG    | Y   | N                           |
| #25  | F | 80  | ND | pT2b N1 | IV   | Y  | HG    | Y   | N                           |
| #26  | M | 60  | Y  | pT3a N0 | III  | Y  | HG    | Y   | N                           |
| #27  | M | 65  | Y  | pT2b N0 | II   | N  | HG    | Y   | N                           |
| #28  | M | 76  | Y  | pT3a N1 | IV   | Y  | HG    | Y   | N                           |
| #29  | M | 65  | N  | pT2a N0 | II   | Y  | HG    | Y   | Nested                      |
| #30  | M | 57  | N  | pT3a N0 | III  | Y  | HG    | N   | NE, SCC, sarcomatoid,       |
| #31  | F | 86  | Y  | pT3b N0 | III  | Y  | HG    | N   | Nested, SCC, sarcomatoid    |
| #32  | M | 62  | N  | pT4 N0  | III  | Y  | HG    | Y   | Micropapillary, glandular   |
| #33  | M | 70  | N  | pT2b N0 | II   | Y  | HG    | Y   | N                           |
| #34  | M | 68  | Y  | pT3a N2 | IV   | Y  | HG    | N   | SCC, micropapillary         |
| #35  | M | 59  | N  | pT2a N0 | II   | Y  | HG    | N   | N                           |
| #36  | M | 66  | Y  | pT3a N0 | III  | Y  | HG    | N   | N                           |
| #37  | M | 76  | Y  | pT2b N0 | II   | Y  | HG    | Y   | N                           |
| #38  | M | 61  | Y  | pT2b N0 | II   | Y  | HG    | Y   | Sarcomatoid                 |
| #39  | M | 75  | Y  | pT3b N2 | IV   | Y  | HG    | Y   | Micropapillary              |
| #40  | F | 81  | Y  | pT3a N3 | IV   | Y  | HG    | Y   | N                           |
| #41  | M | 74  | Y  | PT3a N0 | III  | Y  | HG    | N   | N                           |
| #42  | M | 64  | Y  | pT4b N0 | IV   | N  | HG    | Y   | Micropapillary, signet ring |
| #43  | M | 73  | Y  | pT4b N0 | IV   | N  | HG    | Y   | Rabdoid                     |
| #44  | F | 82  | Y  | pT4 N1  | IV   | Y  | HG    | Y   | N                           |
| #45  | M | 74  | N  | pT3a N0 | III  | Y  | HG    | Y   | N                           |
| #46  | F | 70  | Y  | pT3b N2 | IV   | N  | HG    | N   | SCC                         |
| #47  | F | 61  | Y  | pT3b N1 | IV   | Y  | HG    | Y   | Micropapillary, pagetoid    |

|     |   |    |   |         |     |   |    |   |                             |
|-----|---|----|---|---------|-----|---|----|---|-----------------------------|
| #48 | M | 67 | N | pT2 N0  | II  | N | HG | Y | N                           |
| #49 | M | 77 | N | pT2a N0 | II  | Y | HG | N | Nested                      |
| #50 | M | 84 | N | pT3a N0 | III | N | HG | Y | SCC                         |
| #51 | M | 65 | N | pT2b N1 | IV  | M | HG | N | N                           |
| #52 | M | 81 | Y | pT4 N0  | III | Y | HG | Y | N                           |
| #53 | M | 84 | Y | pT3a N2 | IV  | Y | HG | Y | Trophoblastic               |
| #54 | M | 76 | Y | pT3a N1 | IV  | Y | HG | N | N                           |
| #55 | M | 82 | N | pT3a N0 | III | Y | HG | Y | Nested                      |
| #56 | F | 80 | Y | pT3a N1 | IV  | Y | HG | N | N                           |
| #57 | M | 85 | Y | pT3a N0 | III | Y | HG | Y | N                           |
| #58 | M | 65 | N | pT2b N0 | II  | N | HG | N | N                           |
| #59 | M | 72 | N | pT3a N0 | III | Y | HG | Y | Glandular                   |
| #60 | F | 47 | Y | pT4 N0  | III | Y | HG | N | N                           |
| #61 | M | 85 | N | pT4 N1  | IV  | N | HG | Y | SCC, basaloid               |
| #62 | M | 81 | N | pT4 N0  | III | N | HG | Y | N                           |
| #63 | M | 77 | N | pT2a N0 | II  | N | HG | Y | N                           |
| #64 | M | 83 | N | pT2a N0 | II  | N | HG | Y | N                           |
| #65 | M | 87 | N | pT2b N0 | II  | N | HG | Y | SCC                         |
| #66 | M | 74 | N | pT3a N0 | III | N | HG | N | Sarcomatoid                 |
| #67 | M | 72 | N | pT2a N1 | IV  | N | HG | Y | Micropapillary, pagetoid    |
| #68 | M | 72 | N | pT2 N0  | II  | N | HG | Y | N                           |
| #69 | M | 69 | Y | pT3a N2 | IV  | N | HG | Y | Micropapillary              |
| #70 | M | 79 | Y | pT3a N1 | IV  | N | HG | N | N                           |
| #71 | M | 72 | N | pT2 N0  | II  | N | HG | Y | N                           |
| #72 | F | 41 | N | pT4a N1 | IV  | Y | HG | N | SCC                         |
| #73 | M | 85 | Y | pT4a N0 | III | N | HG | N | Micropapillary, sarcomatoid |
| #74 | M | 80 | Y | pT3a N1 | IV  | N | HG | N | N                           |
| #75 | F | 82 | Y | pT3a N1 | IV  | N | HG | N | NE, limphoepithelioma-like  |
| #76 | M | 54 | N | pT3a N0 | III | Y | HG | Y | Sinciziale                  |
| #77 | M | 66 | N | pT3a N2 | IV  | Y | HG | Y | N                           |
| #78 | M | 82 | N | pT4 N1  | IV  | N | HG | Y | N                           |
| #79 | F | 79 | Y | pT3a N0 | III | Y | HG | N | N                           |
| #80 | M | 49 | N | pT4 N0  | III | Y | HG | N | N                           |
| #81 | F | 82 | Y | pT3a N0 | III | N | HG | Y | N                           |
| #82 | M | 79 | N | pT3a N0 | III | N | HG | Y | Micropapillary              |
| #83 | M | 65 | N | pT4 N2  | IV  | N | HG | N | Plasmocytoid, signet ring   |
| #84 | M | 65 | Y | pT4a N2 | IV  | Y | HG | Y | N                           |
| #85 | M | 79 | N | pT3a N0 | III | N | HG | N | Micropapillary              |
| #86 | M | 71 | Y | pT4 N0  | III | N | HG | Y | N                           |
| #87 | M | 85 | Y | pT2 N1  | IV  | N | HG | Y | N                           |
| #88 | M | 73 | Y | pT3a N1 | IV  | Y | HG | Y | SCC                         |
| #89 | F | 75 | N | pT3a N2 | IV  | Y | HG | Y | N                           |

pT: T staging on TURB (trans-urethral resection biopsy)

CP: clinical progression (Y: yes, N: no, ND: not determined)

pTN: Staging on following cystectomy

HG: high grade; LG: low grade

CIS: Concomitant presence of carcinoma in situ (yes/no)

**Supplementary Table S3. MIBC subtype by immunohistochemistry score (retrospective UBC cohort).**

| Case | Age | G | pSTAT3 | CK5 | CK14 | CK20 | UPK2 | MYC | FOSL1 | Subtype | pTN     | Stag |
|------|-----|---|--------|-----|------|------|------|-----|-------|---------|---------|------|
| #1   | 51  | M | 2      | 0   | 0    | 1    | 2    | -   | -     | Luminal | pT2a N0 | II   |
| #2   | 68  | M | 3      | 3   | 0    | 0    | 0    | 3   | 3     | Basal   | pT2b N0 | II   |
| #3   | 82  | M | 3      | 3   | 1    | 0    | 0    | 2   | 3     | Basal   | pT4 N0  | III  |
| #4   | 73  | M | 3      | 3   | 2    | 0    | 0    | 3   | 2     | Basal   | pT3b N0 | III  |
| #5   | 68  | M | 1      | 0   | 0    | 1    | 1    | -   | -     | Luminal | pT3b N1 | IV   |
| #6   | 57  | M | 2      | 2   | 0    | 0    | 2    | -   | -     | Heterog | pT2b N0 | II   |
| #7   | 52  | M | 1      | 3   | 0    | 1    | 0    | 1   | 3     | Basal   | pT2b N0 | II   |
| #8   | 78  | M | 3      | 1   | 1    | 1    | 1    | -   | -     | Heterog | pT3a N0 | III  |
| #9   | 73  | M | 3      | 3   | 1    | 0    | 0    | 3   | 2     | Basal   | pT3a N0 | III  |
| #10  | 54  | F | 2      | 0   | 0    | 2    | 3    | 2   | 1     | Luminal | pT2b N0 | II   |
| #11  | 78  | M | 2      | 2   | 0    | 1    | 1    | -   | -     | Heterog | pT3a N0 | III  |
| #12  | 70  | F | 2      | 0   | 0    | 3    | 3    | 2   | 1     | Luminal | pT2b N0 | II   |
| #13  | 51  | M | 3      | 2   | 3    | 0    | 0    | 2   | 3     | Basal   | pT2b N0 | II   |
| #14  | 61  | M | 2      | 3   | 3    | 1    | 0    | 3   | 3     | Basal   | pT2 N0  | II   |
| #15  | 69  | M | 1      | 1   | 0    | 3    | 3    | 3   | 2     | Luminal | pT2b N0 | II   |
| #16  | 71  | M | 1      | 2   | 0    | 1    | 2    | -   | -     | Heterog | pT3 N0  | III  |
| #17  | 76  | M | 0      | 3   | 0    | 0    | 0    | 0   | 0     | Basal   | pT3a N0 | III  |
| #18  | 56  | M | 0      | 3   | 0    | 2    | 1    | -   | -     | Heterog | pT3a N0 | III  |
| #19  | 65  | M | 1      | 0   | 1    | 2    | 2    | 1   | 1     | Luminal | pT4a N0 | III  |
| #20  | 69  | M | 3      | 3   | 2    | 0    | 0    | 3   | 3     | Basal   | pT4 N0  | III  |
| #21  | 73  | M | 1      | 0   | 0    | 1    | 0    | -   | -     | Negativ | pT3b N2 | IV   |
| #22  | 90  | F | 3      | 3   | 2    | 0    | 0    | 2   | 3     | Basal   | pT2b N0 | II   |
| #23  | 57  | M | 2      | 2   | 0    | 3    | 2    | -   | -     | Heterog | pT3a N0 | III  |
| #24  | 75  | M | 1      | 0   | 0    | 0    | 3    | 1   | 0     | Luminal | pT3a N1 | IV   |
| #25  | 80  | F | 2      | 0   | 0    | 2    | 2    | 3   | 0     | Luminal | pT2b N1 | IV   |
| #26  | 60  | M | 2      | 0   | 0    | 0    | 0    | -   | -     | Negativ | pT3a N0 | III  |
| #27  | 65  | M | 1      | 0   | 0    | 1    | 2    | -   | -     | Luminal | pT2b N0 | II   |
| #28  | 76  | M | 1      | 0   | 1    | 3    | 3    | 0   | 1     | Luminal | pT3a N1 | IV   |
| #29  | 65  | M | 1      | 1   | 0    | 3    | 3    | -   | -     | Luminal | pT2a N0 | II   |
| #30  | 57  | M | 3      | 2   | 2    | 1    | 0    | 2   | 3     | Basal   | pT3a N0 | III  |
| #31  | 86  | F | 3      | 3   | 0    | 1    | 0    | 1   | 0     | Basal   | pT3b N0 | III  |
| #32  | 62  | M | 1      | 0   | 0    | 3    | 2    | 0   | 0     | Luminal | pT4 N0  | III  |
| #33  | 70  | M | 1      | 0   | 0    | 2    | 2    | -   | -     | Luminal | pT2b N0 | II   |
| #34  | 68  | M | 2      | 2   | 1    | 2    | 2    | -   | -     | Heterog | pT3a N2 | IV   |
| #35  | 59  | M | 1      | 1   | 0    | 3    | 3    | 1   | 1     | Luminal | pT2a N0 | II   |
| #36  | 66  | M | 3      | 3   | 2    | 0    | 1    | 2   | 3     | Basal   | pT3a N0 | III  |
| #37  | 76  | M | 2      | 2   | 1    | 2    | 1    | -   | -     | Heterog | pT2b N0 | II   |
| #38  | 61  | M | 3      | 1   | 1    | 2    | 1    | -   | -     | Heterog | pT2b N0 | II   |
| #39  | 75  | M | 1      | 0   | 0    | 1    | 2    | -   | -     | Luminal | pT3b N2 | IV   |
| #40  | 81  | F | 1      | 1   | 0    | 1    | 3    | 0   | 0     | Luminal | pT3a N3 | IV   |
| #41  | 74  | M | 3      | 3   | 0    | 2    | 0    | -   | -     | Heterog | PT3a N0 | III  |
| #42  | 64  | M | 1      | 1   | 0    | 1    | 2    | -   | -     | Luminal | pT4b N0 | IV   |
| #43  | 73  | M | 0      | 0   | 2    | 3    | 3    | -   | -     | Heterog | pT4b N0 | IV   |
| #44  | 82  | F | 1      | 1   | 0    | 3    | 3    | -   | -     | Luminal | pT4 N1  | IV   |
| #45  | 74  | M | 0      | 0   | 0    | 3    | 3    | 2   | 2     | Luminal | pT3a N0 | III  |
| #46  | 70  | F | 2      | 3   | 0    | 2    | 0    | -   | -     | Heterog | pT3b N2 | IV   |
| #47  | 61  | F | 1      | 0   | 0    | 3    | 3    | 0   | 0     | Luminal | pT3b N1 | IV   |

|     |    |   |   |   |   |   |   |   |   |         |         |     |
|-----|----|---|---|---|---|---|---|---|---|---------|---------|-----|
| #48 | 67 | M | 2 | 1 | 0 | 0 | 0 | - | - | Negativ | pT2 N0  | II  |
| #49 | 77 | M | 1 | 0 | 0 | 3 | 3 | 1 | 1 | Luminal | pT2a N0 | II  |
| #50 | 84 | M | 1 | 3 | 1 | 1 | 2 | - | - | Heterog | pT3a N0 | III |
| #51 | 65 | M | 2 | 3 | 1 | 1 | 0 | 3 | 3 | Basal   | pT2b N1 | IV  |
| #52 | 81 | M | 3 | 2 | 1 | 1 | 2 | - | - | Heterog | pT4 N0  | III |
| #53 | 84 | M | 2 | 3 | 2 | 0 | 0 | 2 | 3 | Basal   | pT3a N2 | IV  |
| #54 | 76 | M | 1 | 2 | 1 | 2 | 1 | - | - | Heterog | pT3a N1 | IV  |
| #55 | 82 | M | 1 | 0 | 1 | 0 | 3 | - | - | Luminal | pT3a N0 | III |
| #56 | 80 | F | 1 | 1 | 3 | 1 | 3 | - | - | Heterog | pT3a N1 | IV  |
| #57 | 85 | M | 1 | 1 | 0 | 3 | 2 | - | - | Luminal | pT3a N0 | III |
| #58 | 65 | M | 2 | 1 | 0 | 3 | 1 | - | - | Luminal | pT2b N0 | II  |
| #59 | 72 | M | 2 | 0 | 0 | 1 | 2 | - | - | Luminal | pT3a N0 | III |
| #60 | 47 | F | 3 | 3 | 2 | 0 | 0 | 3 | 3 | Basal   | pT4 N0  | III |
| #61 | 85 | M | 2 | 3 | 1 | 0 | 0 | 3 | 1 | Basal   | pT4 N1  | IV  |
| #62 | 81 | M | 1 | 3 | 3 | 2 | 2 | - | - | Heterog | pT4 N0  | III |
| #63 | 77 | M | 2 | 1 | 0 | 3 | 3 | - | - | Luminal | pT2a N0 | II  |
| #64 | 83 | M | 1 | 1 | 0 | 2 | 3 | - | - | Luminal | pT2a N0 | II  |
| #65 | 87 | M | 2 | 2 | 1 | 1 | 2 | - | - | Heterog | pT2b N0 | II  |
| #66 | 74 | M | 3 | 3 | 2 | 0 | 0 | 2 | 3 | Basal   | pT3a N0 | III |
| #67 | 72 | M | 3 | 1 | 0 | 3 | 3 | 0 | 1 | Luminal | pT2a N1 | IV  |
| #68 | 72 | M | 2 | 2 | 1 | 2 | 3 | - | - | Heterog | pT2 N0  | II  |
| #69 | 69 | M | 2 | 1 | 0 | 3 | 3 | 0 | 2 | Luminal | pT3a N2 | IV  |
| #70 | 79 | M | 1 | 1 | 0 | 0 | 1 | - | - | Heterog | pT3a N1 | IV  |
| #71 | 72 | M | 0 | 0 | 0 | 3 | 3 | 1 | 1 | Luminal | pT2 N0  | II  |
| #72 | 41 | F | 3 | 3 | 3 | 0 | 0 | 3 | 2 | Basal   | pT4a N1 | IV  |
| #73 | 85 | M | 1 | 3 | 3 | 0 | 0 | 2 | 3 | Basal   | pT4a N0 | III |
| #74 | 80 | M | 1 | 0 | 0 | 3 | 3 | 1 | 0 | Luminal | pT3a N1 | IV  |
| #75 | 82 | F | 0 | 0 | 0 | 0 | 0 | - | - | Negativ | pT3a N1 | IV  |
| #76 | 54 | M | 0 | 0 | 0 | 3 | 3 | 1 | 1 | Luminal | pT3a N0 | III |
| #77 | 66 | M | 0 | 0 | 0 | 3 | 3 | 2 | 2 | Luminal | pT3a N2 | IV  |
| #78 | 82 | M | 1 | 2 | 0 | 0 | 3 | - | - | Heterog | pT4 N1  | IV  |
| #79 | 79 | F | 3 | 3 | 2 | 0 | 0 | 3 | 3 | Basal   | pT3a N0 | III |
| #80 | 49 | M | 1 | 0 | 1 | 3 | 3 | - | - | Luminal | pT4 N0  | III |
| #81 | 82 | F | 2 | 0 | 0 | 3 | 3 | 1 | 0 | Luminal | pT3a N0 | III |
| #82 | 79 | M | 1 | 0 | 0 | 3 | 2 | - | - | Luminal | pT3a N0 | III |
| #83 | 65 | M | 1 | 0 | 0 | 2 | 3 | - | - | Luminal | pT4 N2  | IV  |
| #84 | 65 | M | 2 | 0 | 0 | 3 | 3 | 1 | 1 | Luminal | pT4a N2 | IV  |
| #85 | 79 | M | 1 | 0 | 0 | 1 | 3 | - | - | Luminal | pT3a N0 | III |
| #86 | 71 | M | 0 | 0 | 0 | 1 | 1 | - | - | Luminal | pT4 N0  | III |
| #87 | 85 | M | 1 | 0 | 0 | 3 | 3 | - | - | Luminal | pT2 N1  | IV  |
| #88 | 73 | M | 2 | 3 | 1 | 0 | 0 | 1 | 2 | Basal   | pT3a N1 | IV  |
| #89 | 75 | F | 1 | 0 | 0 | 3 | 3 | - | - | Luminal | pT3a N2 | IV  |

Heterog = “non-type” UBC

**Supplementary Table S4. Patients characteristics and pSTAT3 score of NMIBCs (retrospective UBC cohort).**

| Case | G | A  | pT   | pTN  | AJCC Stage | CP | Grade | CIS | pSTAT3 |
|------|---|----|------|------|------------|----|-------|-----|--------|
| #1   | M | 48 | pTa  | NA   | 0          | N  | LG    | N   | 0      |
| #2   | M | 66 | pTa  | NA   | 0          | N  | LG    | N   | 3      |
| #3   | F | 37 | pTa  | NA   | 0          | N  | LG    | N   | 3      |
| #4   | M | 75 | pTa  | NA   | 0          | N  | LG    | N   | 1      |
| #5   | M | 58 | pTa  | NA   | 0          | N  | LG    | N   | 2      |
| #6   | F | 65 | pTa  | NA   | 0          | N  | LG    | N   | 1      |
| #7   | M | 78 | pTa  | NA   | 0          | N  | LG    | N   | 0      |
| #8   | F | 58 | pTa  | NA   | 0          | N  | LG    | N   | 0      |
| #9   | M | 48 | pTa  | NA   | 0          | N  | LG    | N   | 1      |
| #10  | M | 70 | pTa  | NA   | 0          | N  | LG    | N   | 0      |
| #11  | M | 62 | pTa  | NA   | 0          | N  | LG    | N   | 1      |
| #12  | M | 45 | pTa  | NA   | 0          | N  | LG    | N   | 0      |
| #13  | M | 72 | pTa  | NA   | 0          | N  | LG    | N   | 0      |
| #14  | M | 80 | pTa  | NA   | 0          | N  | LG    | N   | 0      |
| #15  | M | 70 | pTa  | NA   | 0          | N  | LG    | N   | 0      |
| #16  | F | 59 | pTa  | NA   | 0          | N  | LG    | N   | 0      |
| #17  | M | 81 | pTa  | NA   | 0          | N  | LG    | N   | 1      |
| #18  | M | 73 | pTa  | NA   | 0          | N  | LG    | N   | 0      |
| #19  | M | 62 | pTa  | NA   | 0          | N  | LG    | N   | 0      |
| #20  | M | 51 | pTa  | NA   | 0          | N  | LG    | N   | 0      |
| #21  | M | 83 | pTa  | NA   | 0          | N  | LG    | N   | 0      |
| #22  | M | 30 | pTa  | NA   | 0          | N  | LG    | N   | 0      |
| #23  | F | 76 | pTa  | NA   | 0          | N  | LG    | N   | 1      |
| #24  | M | 71 | pTa  | NA   | 0          | N  | LG    | N   | 0      |
| #25  | M | 55 | pTa  | NA   | 0          | N  | LG    | N   | 1      |
| #26  | M | 75 | pT1  | pT2b | I          | Y  | HG    | N   | 1      |
| #27  | M | 75 | pT1  | pT3a | I          | Y  | HG    | Y   | 0      |
| #28  | M | 69 | pTis | pT4  | 0          | Y  | HG    | Y   | 0      |
| #29  | M | 69 | pT1  | pT2b | I          | Y  | HG    | N   | 2      |
| #30  | F | 72 | pTa  | pT3b | 0          | Y  | HG    | N   | 1      |
| #31  | M | 64 | pT1  | pT2b | I          | Y  | HG    | Y   | 1      |
| #32  | F | 74 | pT1  | pT3b | I          | Y  | HG    | N   | 1      |
| #33  | M | 60 | pT1  | pT2b | I          | Y  | HG    | Y   | 1      |
| #34  | F | 69 | pTa  | pT3a | 0          | Y  | HG    | N   | 3      |
| #35  | M | 69 | pT1  | pT3a | I          | Y  | HG    | N   | 0      |
| #36  | F | 62 | pT1  | pT3a | I          | Y  | HG    | Y   | 2      |
| #37  | F | 80 | pT1  | pT3b | I          | Y  | HG    | Y   | 1      |
| #38  | M | 78 | pTa  | pT3b | 0          | Y  | HG    | Y   | 2      |
| #39  | M | 80 | pT1  | pT2a | I          | Y  | HG    | N   | 1      |
| #40  | M | 53 | pT1  | pT4b | I          | Y  | HG    | Y   | 2      |
| #41  | M | 84 | pT1  | pT4  | I          | Y  | HG    | Y   | 1      |
| #42  | F | 87 | pTa  | pT2  | 0          | Y  | HG    | N   | 1      |
| #43  | M | 72 | pT1  | pT4  | I          | Y  | HG    | Y   | 1      |
| #44  | M | 56 | pT1  | pT4  | I          | Y  | HG    | Y   | 2      |
| #45  | M | 69 | pT1  | pT3a | I          | Y  | HG    | Y   | 1      |
| #46  | M | 87 | pT1  | pT4  | I          | Y  | HG    | Y   | 2      |

|     |   |    |         |      |   |   |    |   |   |
|-----|---|----|---------|------|---|---|----|---|---|
| #47 | M | 75 | pTa     | pT4a | 0 | Y | HG | N | 2 |
| #48 | M | 75 | pT1     | pT2b | I | Y | HG | Y | 0 |
| #49 | F | 66 | pT1     | pT4a | I | Y | HG | Y | 3 |
| #50 | M | 66 | pT1     | pT3a | I | Y | HG | N | 1 |
| #51 | M | 62 | pTa     | pT3a | 0 | Y | HG | N | 0 |
| #52 | M | 66 | pT1     | pT1  | I | Y | HG | N | 1 |
| #53 | F | 67 | pT1     | pT1  | I | Y | HG | N | 1 |
| #54 | M | 67 | pT1     | pTis | I | N | HG | Y | 1 |
| #55 | M | 74 | pT1     | pTis | I | Y | HG | Y | 2 |
| #56 | F | 81 | pTa     | pT1  | 0 | N | HG | N | 0 |
| #57 | F | 72 | pT1     | pTa  | I | N | HG | Y | 0 |
| #58 | M | 78 | pT1     | pT1  | I | N | HG | N | 1 |
| #59 | M | 58 | pT1     | pT1  | I | N | HG | Y | 1 |
| #60 | M | 87 | pT1     | pT1  | I | Y | HG | Y | 1 |
| #61 | M | 75 | pTa     | pT1  | 0 | Y | HG | Y | 1 |
| #62 | M | 67 | pT1     | pT1  | I | Y | HG | Y | 2 |
| #63 | M | 69 | pT1     | pT1  | I | Y | HG | Y | 2 |
| #64 | M | 64 | pTis    | pT1  | 0 | Y | HG | Y | 0 |
| #65 | M | 76 | pTa     | pT1  | 0 | N | HG | N | 2 |
| #66 | M | 74 | pT1     | pT1  | I | N | HG | Y | 1 |
| #67 | M | 70 | pTa     | pTis | 0 | N | HG | Y | 2 |
| #68 | M | 52 | pTa     | pTa  | 0 | N | HG | N | 1 |
| #69 | F | 74 | pT1     | pTis | I | N | HG | Y | 3 |
| #70 | F | 68 | pT1     | pTis | I | N | HG | Y | 2 |
| #71 | M | 69 | pT1     | pT1  | I | Y | HG | Y | 1 |
| #72 | M | 55 | pT1     | pT1  | I | N | HG | N | 3 |
| #73 | M | 76 | pTa     | pTis | I | N | HG | Y | 1 |
| #74 | M | 64 | pTis    | pTis | 0 | N | HG | Y | 1 |
| #75 | M | 68 | pT1     | pT1  | I | N | HG | Y | 2 |
| #76 | M | 66 | pT1     | pTis | I | N | HG | Y | 1 |
| #77 | M | 63 | pTa     | NA   | 0 | N | HG | N | 0 |
| #78 | M | 62 | pT1     | NA   | I | N | HG | Y | 0 |
| #79 | M | 82 | pT1     | NA   | I | N | HG | N | 0 |
| #80 | M | 74 | pTa     | NA   | 0 | N | HG | N | 0 |
| #81 | M | 70 | pTa     | NA   | 0 | N | HG | N | 1 |
| #82 | M | 80 | pTa     | NA   | 0 | N | HG | N | 3 |
| #83 | M | 80 | pT1     | NA   | I | N | HG | N | 2 |
| #84 | M | 68 | pTa     | NA   | 0 | N | HG | N | 1 |
| #85 | M | 78 | pT1     | NA   | I | N | HG | N | 1 |
| #86 | M | 57 | pT1     | NA   | I | N | HG | N | 0 |
| #87 | M | 81 | pT1     | NA   | I | N | HG | N | 3 |
| #88 | M | 69 | pTa     | NA   | 0 | N | HG | N | 2 |
| #89 | M | 86 | pT1     | NA   | I | N | HG | N | 3 |
| #90 | M | 67 | pT1     | NA   | I | N | HG | Y | 0 |
| #91 | M | 52 | pT1     | NA   | I | N | HG | N | 1 |
| #92 | M | 72 | pT1     | NA   | I | N | HG | N | 0 |
| #93 | M | 75 | pTa/Tis | NA   | 0 | N | HG | Y | 0 |
| #94 | M | 72 | pT1     | NA   | I | N | HG | N | 2 |
| #95 | M | 51 | pTis    | NA   | 0 | N | HG | Y | 0 |



|      |   |    |      |    |   |   |    |   |   |
|------|---|----|------|----|---|---|----|---|---|
| #96  | M | 78 | pT1  | NA | I | N | HG | Y | 2 |
| #97  | M | 75 | pTis | NA | 0 | N | HG | Y | 1 |
| #98  | M | 70 | pTa  | NA | 0 | N | HG | N | 1 |
| #99  | M | 53 | pTis | NA | 0 | N | HG | Y | 0 |
| #100 | M | 68 | pT1  | NA | I | N | HG | Y | 0 |
| #101 | F | 56 | pT1  | NA | I | N | HG | Y | 2 |
| #102 | M | 69 | pT1  | NA | I | N | HG | Y | 3 |
| #103 | M | 65 | pTis | NA | 0 | N | HG | Y | 0 |
| #104 | M | 76 | pTa  | NA | 0 | N | HG | N | 1 |
|      |   |    |      |    |   |   |    |   |   |

pT: T staging on TURB (trans-urethral resection biopsy)

CP: clinical progression (Y: yes, N: no)

pTN: Staging on following cystectomy if performed

HG: high grade; LG: low grade

NA: not applicable

CIS: Concomitant presence of carcinoma in situ (yes/no)

**Supplementary Table S5. TaqMan™ Gene Expression Assays.**

| <b>Gene</b> | <b>Cat. no.</b> |
|-------------|-----------------|
| IL6         | Hs00174132_m1   |
| IL1B        | Hs01555410_m1   |
| SOCS1       | Hs00864158_g1   |
| SOCS3       | Hs01000485_g1   |
| STAT3       | Hs00374280_m1   |
| MYC         | Hs00153408_m1   |
| FOS         | Hs00170630_m1   |
| FOSL1       | Hs04187685_m1   |
| TP53        | Hs01034249_m1   |
| NFKB1       | Hs00765730_m1   |
| TWIST       | Hs00361186_m1   |
| SNAI1       | Hs00195591_m1   |
| NANOG       | Hs02387400_g1   |
| POU5F1      | Hs00999632_g1   |
| HIF1A       | Hs00153153_m1   |
| BCL2        | Hs00608023_m1   |
| BCL2L1      | Hs00236329_m1   |
| MCL1        | Hs01050896_m1   |
| BNIP3       | Hs00969291_m1   |
| BIRC5       | Hs00153353_m1   |
| CCDN1       | Hs00765553_m1   |
| CD44        | Hs01075861_m1   |
| KRT14       | Hs03044364_m1   |
| MMP1        | Hs00899658_m1   |
| MMP9        | Hs00957562_m1   |
| VEGFA       | Hs00900055_m1   |
| HPRT1       | 4333768T        |

TaqMan™ Gene Expression Assays were from Applied Biosystems, Thermo Fisher Scientific.

**Supplementary Table S6. Fold Change analysis of the expression of STAT3-regulated transcripts in UBC cell lines.**

| Gene   | <i>RT4_vs_5637_STAT3</i> |         | <i>si-STAT3_vs_si-scrambled 5637</i> |         | <i>si-STAT3_vs_si-scrambled RT4</i> |         | <i>si-STAT3_vs_si-scrambled HT-1376</i> |         | <i>si-STAT3_vs_si-scrambled T24</i> |         |
|--------|--------------------------|---------|--------------------------------------|---------|-------------------------------------|---------|-----------------------------------------|---------|-------------------------------------|---------|
|        | FC                       | FDR     | FC                                   | FDR     | FC                                  | FDR     | FC                                      | FDR     | FC                                  | FDR     |
| IL6    | 0,02752                  | 0,00097 | 1,30586                              | 0,29872 | 1,81504                             | 0,05553 | 0,97265                                 | 0,91888 | 1,24401                             | 0,46184 |
| IL1B   | 0,1169                   | 1,8E-05 | 0,84675                              | 0,40529 | 1,15269                             | 0,74606 | 1,54756                                 | 0,10239 | 1,6529                              | 0,11474 |
| SOCS1  | 1,07425                  | 0,62903 | 1,65864                              | 0,21276 | 1,81504                             | 0,13627 | 1,07923                                 | 0,83819 | 1,8025                              | 0,20298 |
| SOCS3  | 0,5535                   | 0,10817 | 0,69496                              | 0,25002 | 0,94278                             | 0,94597 | 1,68179                                 | 0,1463  | 1,08298                             | 0,78396 |
| STAT3  | 0,51883                  | 0,00365 | 0,1155                               | 0,0017  | 0,16724                             | 0,00606 | 0,23245                                 | 0,02195 | 0,12763                             | 0,0047  |
| MYC    | 0,2885                   | 0,0002  | 0,79692                              | 0,25446 | 1,12054                             | 0,76453 | 0,98623                                 | 0,92092 | 1,05702                             | 0,78396 |
| FOS    | 9,9406                   | 1E-05   | 0,57435                              | 0,02046 | 1,02456                             | 0,94597 | 0,5946                                  | 0,0393  | 1,47939                             | 0,11905 |
| FOSL1  | 0,08617                  | 1,8E-05 | 0,60082                              | 0,05413 | 1,00696                             | 0,96601 | 1,09429                                 | 0,83819 | 0,87661                             | 0,56348 |
| TP53   | 0,24599                  | 1,8E-05 | 1,47939                              | 0,18425 | 1,02101                             | 0,94597 | 1,53156                                 | 0,15352 | 1,31494                             | 0,34684 |
| NFKB1  | 1,10957                  | 0,04967 | 1,20999                              | 0,20493 | 1,04608                             | 0,86792 | 1,61328                                 | 0,02195 | 1,01045                             | 0,91422 |
| TWIST1 | 7,4E-05                  | 5E-07   | 1,02101                              | 0,89865 | 0,59874                             | 0,05553 | 1,7593                                  | 0,0393  | 1,37078                             | 0,27433 |
| SNAI1  | 0,21714                  | 0,00052 | 1,46409                              | 0,36536 | 1,81504                             | 0,24895 | 1,10957                                 | 0,83819 | 1,19334                             | 0,73418 |
| NANOG  | 1,56917                  | 0,00371 | 1,40444                              | 0,76355 | 1,54756                             | 0,86792 | 1,34723                                 | 0,83819 | 0,38024                             | 0,46184 |
| POU5F1 | 1,87905                  | 0,00173 | 1,6529                               | 0,01786 | 1,06807                             | 0,85672 | 1,11729                                 | 0,67323 | 1,12117                             | 0,47616 |
| HIF1A  | 6,40856                  | 0,00063 | 1,75564                              | 0,18425 | 0,10844                             | 0,00061 | 1,56374                                 | 0,31257 | 1,47939                             | 0,34684 |
| BCL2   | 1,53688                  | 0,00475 | 0,62851                              | 0,27874 | 0,75786                             | 0,74606 | 0,87661                                 | 0,83819 | 0,59255                             | 0,30959 |
| BCL2L1 | 0,64767                  | 0,00329 | 1,21841                              | 0,29872 | 0,72951                             | 0,13627 | 1,08298                                 | 0,83819 | 1,16878                             | 0,46184 |
| MCL1   | 0,51169                  | 0,00066 | 0,46652                              | 0,00102 | 0,8827                              | 0,4908  | 1,12506                                 | 0,50344 | 1,34723                             | 0,11474 |
| BNIP3  | 0,33294                  | 0,00329 | 0,68777                              | 0,58267 | 0,92019                             | 0,94597 | 0,42928                                 | 0,35855 | 0,9298                              | 0,91422 |
| BIRC5  | 0,74226                  | 0,03655 | 1,10573                              | 0,55609 | 1,07923                             | 0,85672 | 1,6077                                  | 0,0393  | 1,10957                             | 0,56348 |
| CCND1  | 1,00463                  | 0,95685 | 1,03886                              | 0,8135  | 1,66324                             | 0,03562 | 1,3566                                  | 0,15752 | 1,42899                             | 0,12914 |
| CD44   | 0,20781                  | 2,6E-05 | 0,87055                              | 0,24696 | 1,04972                             | 0,85672 | 0,96929                                 | 0,83819 | 1,24401                             | 0,11905 |
| KRT14  | 0,02616                  | 6,5E-05 | 0,39338                              | 0,02029 | 0,39915                             | 0,0296  | 0,92338                                 | 0,83819 | 1,48968                             | 0,30959 |
| MMP1   | 0,00121                  | 1,9E-06 | 0,40613                              | 0,30453 | 1,08673                             | 0,94597 | 0,56841                                 | 0,75387 | 0,78458                             | 0,78396 |
| MMP9   | 0,00367                  | 8,9E-06 | 1,14076                              | 0,60303 | 1,81504                             | 0,06446 | 1,09051                                 | 0,83819 | 0,80107                             | 0,46184 |
| VEGFA  | 0,88782                  | 0,62903 | 0,69834                              | 0,30453 | 1,07549                             | 0,94597 | 0,81225                                 | 0,75387 | 1,38992                             | 0,46184 |

Supplementary Table S7: coefficients for UBC subtype (Basal, Luminal) classification using elastic-net for STAT3 targets (TCGA cohort). Scaled coefficients report the relative importance (magnitude) of coefficients on absolute scale. \*Genes selected via stability path variable selection.

|               | Coefficients<br>(scaled) | Coefficients<br>(value) |
|---------------|--------------------------|-------------------------|
| <b>STAT3*</b> | 100.00                   | -1.13                   |
| <b>BIRC5*</b> | 62.33                    | -0.71                   |
| <b>CD44*</b>  | 51.13                    | -0.58                   |
| <b>SOCS1*</b> | 37.99                    | -0.43                   |
| <b>MYC*</b>   | 26.88                    | -0.30                   |
| <b>POU5F1</b> | 16.55                    | 0.19                    |
| <b>MMP9</b>   | 11.77                    | -0.13                   |
| <b>KRT14*</b> | 11.19                    | -0.13                   |
| <b>HIF1A</b>  | 8.61                     | -0.099                  |
| <b>SNAI1</b>  | 7.75                     | -0.088                  |
| <b>FOS</b>    | 7.68                     | 0.087                   |
| <b>SOCS3</b>  | 5.25                     | -0.060                  |
| <b>FOSL1</b>  | 4.19                     | -0.048                  |

**Supplementary Table S8: Hazard Ratios (HR) for univariate Cox models testing overall survival in STAT3 signature TCGA dataset.**

|        | HR    | p-value |
|--------|-------|---------|
| BCL2   | 1.011 | 0.881   |
| BCL2L1 | 0.992 | 0.944   |
| BIRC5  | 1.029 | 0.704   |
| BNIP3  | 0.992 | 0.885   |
| CCND1  | 0.986 | 0.745   |
| CD44   | 1.084 | 0.090   |
| FOS    | 1.127 | 0.020   |
| FOSL1  | 1.132 | 0.008   |
| HIF1A  | 1.161 | 0.054   |
| IL1B   | 0.995 | 0.898   |
| IL6    | 1.043 | 0.133   |
| KRT14  | 1.038 | 0.030   |
| MCL1   | 1.164 | 0.158   |
| MMP1   | 0.988 | 0.666   |
| MMP9   | 1.069 | 0.030   |
| MYC    | 1.139 | 0.010   |
| NANOG  | 0.931 | 0.144   |
| NFKB1  | 0.931 | 0.545   |
| POU5F1 | 0.891 | 0.006   |
| SNAI1  | 1.119 | 0.036   |
| SOCS1  | 0.997 | 0.955   |
| SOCS3  | 1.136 | 0.028   |
| STAT3  | 1.327 | 0.024   |
| TP53   | 1.055 | 0.488   |
| TWIST1 | 1.108 | 0.007   |
| VEGFA  | 0.880 | 0.050   |

**Supplementary Table S9. Fold Change (FC) for Luminal *vs* Basal comparison in FOSL1 signature in TCGA and GSE32894 datasets. .**

|          | TCGA  |         |         | GSE32894 |         |         |
|----------|-------|---------|---------|----------|---------|---------|
|          | FC    | P-value | FDR     | FC       | P-value | FDR     |
| PLAUR    | 0.252 | < 1e-04 | < 1e-04 | 0.426    | < 0.001 | < 0.001 |
| IL1RAP   | 0.247 | < 1e-04 | < 1e-04 | 0.449    | < 0.001 | < 0.001 |
| HMGA2    | 0.030 | < 1e-04 | < 1e-04 | 0.919    | < 0.001 | < 0.001 |
| PLEKHA6  | 4.032 | < 1e-04 | < 1e-04 | 2.338    | < 0.001 | < 0.001 |
| LAMA3    | 0.088 | < 1e-04 | < 1e-04 | 0.427    | < 0.001 | < 0.001 |
| CLCF1    | 0.304 | < 1e-04 | < 1e-04 | 0.623    | < 0.001 | < 0.001 |
| GDF15    | 7.160 | < 1e-04 | < 1e-04 | 2.367    | < 0.001 | < 0.001 |
| FOSL1    | 0.259 | < 1e-04 | < 1e-04 | 0.662    | < 0.001 | < 0.001 |
| IL7R     | 0.194 | < 1e-04 | < 1e-04 | 0.375    | < 0.001 | < 0.001 |
| SRGN     | 0.255 | < 1e-04 | < 1e-04 | 0.276    | < 0.001 | < 0.001 |
| SNAI2    | 0.260 | < 1e-04 | < 1e-04 | 0.411    | < 0.001 | < 0.001 |
| MMP9     | 0.138 | < 1e-04 | < 1e-04 | 0.273    | < 0.001 | < 0.001 |
| AXL      | 0.299 | < 1e-04 | < 1e-04 | 0.517    | < 0.001 | < 0.001 |
| CCNA2    | 0.468 | < 1e-04 | < 1e-04 | 0.544    | < 0.001 | < 0.001 |
| INHBA    | 0.189 | < 1e-04 | < 1e-04 | -        | -       | -       |
| IL22RA2  | 0.162 | < 1e-04 | < 1e-04 | 0.908    | < 0.001 | < 0.001 |
| PTP4A1   | 0.487 | < 1e-04 | < 1e-04 | 0.728    | < 0.001 | < 0.001 |
| ADORA2B  | 0.305 | < 1e-04 | < 1e-04 | 0.509    | < 0.001 | < 0.001 |
| IFI30    | 0.390 | < 1e-04 | < 1e-04 | 0.421    | < 0.001 | < 0.001 |
| VEGFC    | 0.355 | < 1e-04 | < 1e-04 | 0.574    | < 0.001 | < 0.001 |
| PLAU     | 0.283 | < 1e-04 | < 1e-04 | 0.271    | < 0.001 | < 0.001 |
| CCL5     | 0.232 | < 1e-04 | < 1e-04 | 0.413    | < 0.001 | < 0.001 |
| TGFB1    | 0.439 | < 1e-04 | < 1e-04 | -        | -       | -       |
| PPP2R3A  | 0.487 | < 1e-04 | < 1e-04 | 0.920    | 0.11072 | 0.14306 |
| BIRC5    | 0.488 | < 1e-04 | < 1e-04 | 0.793    | < 0.001 | < 0.001 |
| FOXM1    | 0.455 | < 1e-04 | < 1e-04 | 0.725    | < 0.001 | < 0.001 |
| HBEGF    | 0.416 | < 1e-04 | < 1e-04 | 0.422    | < 0.001 | < 0.001 |
| CCL20    | 0.172 | < 1e-04 | < 1e-04 | 0.302    | < 0.001 | < 0.001 |
| IL6      | 0.182 | < 1e-04 | < 1e-04 | 0.435    | < 0.001 | < 0.001 |
| BIRC3    | 0.342 | < 1e-04 | < 1e-04 | 0.773    | < 0.001 | < 0.001 |
| COL7A1   | 0.321 | < 1e-04 | < 1e-04 | 0.338    | < 0.001 | < 0.001 |
| ITGB5    | 0.527 | < 1e-04 | < 1e-04 | 0.674    | < 0.001 | < 0.001 |
| MMP1     | 0.191 | < 1e-04 | < 1e-04 | 0.212    | < 0.001 | < 0.001 |
| CXCL8    | 0.246 | < 1e-04 | < 1e-04 | 0.088    | < 0.001 | < 0.001 |
| IGFBP3   | 3.067 | < 1e-04 | < 1e-04 | 1.565    | < 0.001 | < 0.001 |
| FEN1     | 0.595 | < 1e-04 | < 1e-04 | 0.839    | 0.00803 | 0.01247 |
| SERPINE2 | 0.297 | < 1e-04 | < 1e-04 | 0.375    | < 0.001 | < 0.001 |
| MX1      | 0.398 | < 1e-04 | < 1e-04 | 0.679    | 0.00187 | 0.00325 |

|          |       |          |          |       |         |         |
|----------|-------|----------|----------|-------|---------|---------|
| AURKB    | 0.543 | < 1e-04  | < 1e-04  | 0.625 | < 0.001 | < 0.001 |
| SERPINE1 | 0.323 | < 1e-04  | < 1e-04  | 0.540 | < 0.001 | < 0.001 |
| SFN      | 0.382 | < 1e-04  | < 1e-04  | 0.409 | < 0.001 | < 0.001 |
| PHLDA1   | 0.439 | < 1e-04  | < 1e-04  | 0.339 | < 0.001 | < 0.001 |
| APLN     | 0.391 | < 1e-04  | < 1e-04  | 0.824 | < 0.001 | < 0.001 |
| VDR      | 0.533 | < 1e-04  | < 1e-04  | 0.862 | 0.00137 | 0.00242 |
| ZEB2     | 0.497 | < 1e-04  | < 1e-04  | 0.699 | < 0.001 | < 0.001 |
| RGS5     | 2.193 | < 1e-04  | < 1e-04  | 1.529 | < 0.001 | < 0.001 |
| MCM10    | 0.545 | < 1e-04  | < 1e-04  | 0.616 | < 0.001 | < 0.001 |
| LAMB3    | 0.310 | < 1e-04  | < 1e-04  | 0.906 | 0.00951 | 0.01439 |
| MT1F     | 0.465 | < 1e-04  | < 1e-04  | 0.659 | < 0.001 | < 0.001 |
| MTDH     | 0.689 | < 1e-04  | < 1e-04  | 0.824 | < 0.001 | < 0.001 |
| BGLAP    | 1.787 | < 1e-04  | < 1e-04  | 1.041 | 0.15248 | 0.18654 |
| ABHD11   | 1.598 | < 1e-04  | < 1e-04  | 1.119 | 0.03694 | 0.05446 |
| THBD     | 0.416 | < 1e-04  | < 1e-04  | 0.768 | < 0.001 | < 0.001 |
| VEGFD    | 2.406 | < 1e-04  | < 1e-04  | -     | -       | -       |
| MCM2     | 0.625 | < 1e-04  | < 1e-04  | 0.837 | 0.08606 | 0.11644 |
| COL1A1   | 0.375 | < 1e-04  | < 1e-04  | 0.340 | < 0.001 | < 0.001 |
| PAICS    | 0.738 | < 1e-04  | < 1e-04  | 0.980 | 0.70974 | 0.76281 |
| SEC14L1  | 0.768 | < 1e-04  | < 1e-04  | 0.943 | 0.04355 | 0.06260 |
| CCL2     | 0.464 | < 1e-04  | < 1e-04  | 0.365 | < 0.001 | < 0.001 |
| HHIP     | 3.005 | < 1e-04  | < 1e-04  | 1.063 | 0.07007 | 0.09709 |
| CLCA2    | 0.174 | < 1e-04  | < 1e-04  | 0.176 | < 0.001 | < 0.001 |
| VSIR     | 0.635 | < 1e-04  | < 1e-04  | -     | -       | -       |
| COL1A2   | 0.392 | < 1e-04  | < 1e-04  | 0.417 | < 0.001 | < 0.001 |
| KRT18    | 1.793 | < 1e-04  | < 1e-04  | 0.951 | 0.12535 | 0.15841 |
| CHML     | 0.694 | < 1e-04  | < 1e-04  | 0.989 | 0.65197 | 0.72092 |
| GFRA1    | 2.842 | < 1e-04  | < 1e-04  | 1.055 | 0.03950 | 0.05749 |
| DMTF1    | 1.274 | < 1e-04  | < 1e-04  | 1.085 | 0.08786 | 0.11748 |
| NFATC1   | 0.571 | < 1e-04  | < 1e-04  | 0.946 | 0.19991 | 0.23701 |
| LIF      | 0.521 | < 1e-04  | < 1e-04  | 0.796 | < 0.001 | < 0.001 |
| ADGRG6   | 1.832 | < 1e-04  | < 1e-04  | 1.528 | < 0.001 | < 0.001 |
| H2AFZ    | 0.768 | < 1e-04  | < 1e-04  | 0.830 | 0.00227 | 0.00384 |
| C3       | 0.428 | < 1e-04  | < 1e-04  | 0.893 | < 0.001 | < 0.001 |
| VCAN     | 0.469 | < 1e-04  | < 1e-04  | 0.366 | < 0.001 | < 0.001 |
| IUN      | 0.646 | < 1e-04  | < 1e-04  | 0.696 | 0.00128 | 0.00231 |
| EZH2     | 0.739 | < 1e-04  | < 1e-04  | 0.805 | < 0.001 | 0.00133 |
| EP300    | 1.284 | < 1e-04  | < 1e-04  | 1.103 | 0.02838 | 0.04238 |
| IUND     | 1.341 | < 1e-04  | < 1e-04  | 1.162 | 0.00262 | 0.00428 |
| IVL      | 2.954 | < 1e-04  | < 1e-04  | 1.031 | 0.34274 | 0.39078 |
| PADI2    | 0.567 | < 1e-04  | < 1e-04  | 0.996 | 0.86177 | 0.90921 |
| VEGFB    | 0.796 | < 1e-04  | < 1e-04  | 0.891 | 0.00548 | 0.00875 |
| MED20    | 0.863 | < 1e-04  | 0.000135 | 1.002 | 0.97028 | 0.97028 |
| KCNIP1   | 0.601 | 0.000129 | 0.000196 | 0.999 | 0.93819 | 0.94642 |

|        |       |          |          |       |         |         |
|--------|-------|----------|----------|-------|---------|---------|
| MMP10  | 0.392 | 0.000158 | 0.000236 | 0.350 | < 0.001 | < 0.001 |
| TJAP1  | 1.141 | 0.000192 | 0.000283 | 1.147 | 0.00261 | 0.00428 |
| NPNT   | 0.626 | 0.000208 | 0.000303 | 0.850 | < 0.001 | 0.00136 |
| NTRK2  | 0.500 | 0.000219 | 0.000316 | 0.958 | 0.06729 | 0.09437 |
| DCN    | 0.560 | 0.000232 | 0.000331 | 0.646 | < 0.001 | < 0.001 |
| ITGB4  | 0.699 | 0.000354 | 0.000499 | 0.909 | 0.25892 | 0.30383 |
| E2F1   | 0.739 | 0.000384 | 0.000535 | -     | -       | -       |
| VEGFA  | 1.354 | 0.000457 | 0.000629 | 1.029 | 0.67201 | 0.73601 |
| SP1    | 1.136 | 0.000503 | 0.000685 | 1.201 | < 0.001 | < 0.001 |
| NFE2L3 | 0.744 | 0.001155 | 0.001556 | 1.013 | 0.88684 | 0.91880 |
| USF2   | 1.114 | 0.001799 | 0.002399 | 1.035 | 0.14486 | 0.18108 |
| MMP2   | 0.665 | 0.001911 | 0.002521 | 0.850 | < 0.001 | < 0.001 |
| ZEB1   | 0.760 | 0.002921 | 0.003812 | 0.941 | 0.00714 | 0.01125 |
| CHMP1A | 0.899 | 0.004091 | 0.005284 | 1.008 | 0.87273 | 0.91240 |
| TIMP3  | 0.688 | 0.004305 | 0.005504 | 0.964 | 0.71737 | 0.76387 |
| PLCD4  | 0.862 | 0.007974 | 0.010090 | 0.972 | 0.10491 | 0.13710 |
| CENPM  | 0.847 | 0.015799 | 0.019788 | 0.744 | < 0.001 | < 0.001 |
| HMOX1  | 0.768 | 0.016384 | 0.020316 | 0.705 | 0.00208 | 0.00357 |
| DLC1   | 1.234 | 0.020100 | 0.024677 | 1.635 | < 0.001 | < 0.001 |
| MEF2C  | 0.831 | 0.026392 | 0.032085 | 0.965 | 0.44929 | 0.50655 |
| NPR3   | 0.757 | 0.031772 | 0.038250 | 0.968 | 0.17693 | 0.21417 |
| YTHDF1 | 1.060 | 0.049325 | 0.058811 | 1.081 | 0.05853 | 0.08309 |
| MIR222 | 0.867 | 0.055176 | 0.065161 | -     | -       | -       |
| TXLNG  | 0.927 | 0.076845 | 0.089894 | 1.060 | 0.10228 | 0.13520 |
| NFATC2 | 0.853 | 0.080720 | 0.093545 | -     | -       | -       |
| OLFM1  | 0.827 | 0.140167 | 0.160933 | 0.747 | < 0.001 | < 0.001 |
| NFATC3 | 0.932 | 0.145071 | 0.165035 | 1.002 | 0.92944 | 0.94611 |
| NOS3   | 0.906 | 0.189405 | 0.213511 | 0.816 | < 0.001 | < 0.001 |
| RGS17  | 1.155 | 0.212951 | 0.237891 | 1.133 | 0.34321 | 0.39078 |
| CHAF1A | 0.941 | 0.217252 | 0.240529 | 1.185 | < 0.001 | < 0.001 |
| CCND1  | 0.864 | 0.257271 | 0.282315 | 0.801 | 0.12298 | 0.15714 |
| GIA1   | 0.884 | 0.279507 | 0.304025 | 0.670 | 0.00264 | 0.00428 |
| ABI3BP | 0.872 | 0.311302 | 0.335664 | 0.953 | 0.47398 | 0.52920 |
| SMTN   | 0.945 | 0.421139 | 0.450183 | 0.918 | 0.08525 | 0.11644 |
| PTGES  | 0.922 | 0.513231 | 0.543937 | 0.734 | 0.00941 | 0.01439 |
| HPD    | 0.939 | 0.555979 | 0.584249 | -     | -       | -       |
| RRP1   | 1.025 | 0.617314 | 0.643251 | 0.991 | 0.68015 | 0.73790 |
| MGP    | 0.932 | 0.635638 | 0.656826 | 0.865 | 0.30721 | 0.35686 |
| IUNB   | 0.985 | 0.820709 | 0.841057 | 1.139 | 0.15143 | 0.18654 |
| MIR221 | 0.978 | 0.860449 | 0.874555 | -     | -       | -       |
| SCD    | 1.001 | 0.989317 | 0.995624 | 1.164 | 0.19036 | 0.22803 |
| SH3GL1 | 1.000 | 0.995624 | 0.995624 | 0.996 | 0.92966 | 0.94611 |



**Supplementary Table S10. Fold Change (FC) for MIBCs *vs* NMIBCs comparison in FOSL1 signature in GSE32894 dataset.**

|          | <b>FC</b> | <b>P Value</b> | <b>FDR</b>  |
|----------|-----------|----------------|-------------|
| COL1A1   | 2.5356047 | < 1e-05        | < 1e-05     |
| PLAUR    | 1.6939748 | < 1e-05        | < 1e-05     |
| MCM10    | 1.9861748 | < 1e-05        | < 1e-05     |
| FOXM1    | 1.5092869 | < 1e-05        | < 1e-05     |
| BIRC5    | 1.3451223 | < 1e-05        | < 1e-05     |
| VCAN     | 2.3451953 | < 1e-05        | < 1e-05     |
| IFI30    | 1.8159113 | < 1e-05        | < 1e-05     |
| AURKB    | 1.9607332 | < 1e-05        | < 1e-05     |
| CXCL8    | 4.0862641 | < 1e-05        | < 1e-05     |
| COL1A2   | 2.1468790 | < 1e-05        | < 1e-05     |
| CCNA2    | 1.8150385 | < 1e-05        | < 1e-05     |
| MMP9     | 2.3378038 | < 1e-05        | < 1e-05     |
| PLAU     | 2.1297195 | < 1e-05        | < 1e-05     |
| CCL2     | 2.0923924 | < 1e-05        | < 1e-05     |
| PLEKHA6  | 0.6022658 | < 1e-05        | < 1e-05     |
| FEN1     | 1.4193298 | < 1e-05        | < 1e-05     |
| EZH2     | 1.4019611 | < 1e-05        | < 1e-05     |
| IL7R     | 1.8368629 | < 1e-05        | < 1e-05     |
| MCM2     | 1.7070360 | < 1e-05        | < 1e-05     |
| SRGN     | 2.0954416 | < 1e-05        | < 1e-05     |
| IL6      | 1.6705135 | < 1e-05        | < 1e-05     |
| CLCF1    | 1.3731463 | < 1e-05        | < 1e-05     |
| SERPINE2 | 2.1707132 | < 1e-05        | < 1e-05     |
| CENPM    | 1.3860942 | < 1e-05        | < 1e-05     |
| ZEB2     | 1.2901079 | < 1e-05        | < 1e-05     |
| MMP2     | 1.1522453 | < 1e-05        | < 1e-05     |
| H2AFZ    | 1.2997705 | < 1e-05        | < 1e-05     |
| AXL      | 1.4417805 | < 1e-05        | < 1e-05     |
| CCL20    | 1.8682514 | < 1e-05        | < 1e-05     |
| HMOX1    | 1.5851166 | < 1e-05        | < 1e-05     |
| VEGFC    | 1.4023960 | < 1e-05        | < 1e-05     |
| NOS3     | 1.2668029 | < 1e-05        | 1.03003e-05 |

|          |           |             |             |
|----------|-----------|-------------|-------------|
| BIRC3    | 1.1657742 | < 1e-05     | 1.12629e-05 |
| SP1      | 0.8496119 | < 1e-05     | 1.43182e-05 |
| JUNB     | 0.7039388 | < 1e-05     | 1.90995e-05 |
| MTDH     | 1.2087539 | 2.43526e-05 | 7.77931e-05 |
| EP300    | 0.8511734 | 2.92649e-05 | 9.09584e-05 |
| PHLDA1   | 1.5731298 | 4.88431e-05 | 0.000147815 |
| CCL5     | 1.5771552 | 8.64296e-05 | 0.000254857 |
| COL7A1   | 1.6366861 | 0.000111652 | 0.000320998 |
| APLN     | 1.1630767 | 0.000174709 | 0.000490037 |
| DCN      | 1.3423417 | 0.000201906 | 0.000541316 |
| SERPINE1 | 1.4557155 | 0.000202405 | 0.000541316 |
| IL1RAP   | 1.2799186 | 0.000209241 | 0.000546881 |
| SFN      | 1.3939012 | 0.000333871 | 0.000853227 |
| ADGRG6   | 0.7317863 | 0.000422183 | 0.001055457 |
| VEGFB    | 1.1358593 | 0.000447666 | 0.001095352 |
| LIF      | 1.1335650 | 0.000515445 | 0.001234921 |
| DLC1     | 0.7195023 | 0.000631467 | 0.001482014 |
| OLFM1    | 1.1860706 | 0.001061441 | 0.002441314 |
| MMP1     | 1.7035717 | 0.001545547 | 0.003485058 |
| MGP      | 1.4570076 | 0.002104273 | 0.004653680 |
| ZEB1     | 1.0622405 | 0.002159986 | 0.004686761 |
| LAMA3    | 1.2958991 | 0.003231305 | 0.006881483 |
| ITGB5    | 1.2119039 | 0.003721702 | 0.007781740 |
| PLCD4    | 1.0419211 | 0.007619738 | 0.015446957 |
| HBEGF    | 1.2511455 | 0.007656318 | 0.015446957 |
| ITGB4    | 0.8228962 | 0.008124898 | 0.016109711 |
| RGS5     | 0.7959596 | 0.010092188 | 0.019671214 |
| PPP2R3A  | 1.1222053 | 0.010638770 | 0.020390977 |
| FOSL1    | 1.1607263 | 0.016596782 | 0.031289015 |
| CCND1    | 0.7445787 | 0.018699606 | 0.034684754 |
| HMGA2    | 1.0450083 | 0.020268533 | 0.036998116 |
| IL22RA2  | 1.0516271 | 0.021156131 | 0.038014924 |
| RGS17    | 0.7759614 | 0.026582717 | 0.047030961 |
| NPNT     | 1.0955297 | 0.030236721 | 0.052685195 |
| SEC14L1  | 1.0558761 | 0.031675213 | 0.054367903 |

|         |           |             |             |
|---------|-----------|-------------|-------------|
| MT1F    | 1.2474916 | 0.034142063 | 0.057346711 |
| LAMB3   | 0.9322459 | 0.034408027 | 0.057346711 |
| IVL     | 0.9433530 | 0.038944063 | 0.063979532 |
| PAICS   | 1.1000697 | 0.040711108 | 0.065940527 |
| ABHD11  | 0.9122425 | 0.049692950 | 0.079370685 |
| SMTN    | 1.0876454 | 0.051381904 | 0.080944095 |
| CHAF1A  | 1.0842479 | 0.055132418 | 0.085678758 |
| THBD    | 1.1137228 | 0.059717184 | 0.091566349 |
| SNAI2   | 1.1813526 | 0.070997513 | 0.107430447 |
| KCNIP1  | 1.0257257 | 0.076926195 | 0.114889771 |
| NFATC1  | 1.0662703 | 0.087890583 | 0.129582270 |
| SH3GL1  | 1.0646409 | 0.112642786 | 0.163973676 |
| IGFBP3  | 0.8438425 | 0.120629007 | 0.173404197 |
| MEF2C   | 1.0618542 | 0.141317307 | 0.200635683 |
| CHML    | 1.0312656 | 0.146083385 | 0.204873040 |
| TIMP3   | 0.8806859 | 0.151968053 | 0.209677631 |
| NFATC3  | 1.0355408 | 0.153155835 | 0.209677631 |
| GDF15   | 0.8085161 | 0.160209303 | 0.211647922 |
| PTP4A1  | 1.0794655 | 0.160737491 | 0.211647922 |
| MMP10   | 1.2397214 | 0.161431277 | 0.211647922 |
| TXLNG   | 0.9573697 | 0.161956670 | 0.211647922 |
| PADI2   | 0.9745484 | 0.184868247 | 0.238874702 |
| KRT18   | 0.9646337 | 0.208595116 | 0.266538204 |
| GJA1    | 1.1486759 | 0.236562325 | 0.298952388 |
| PTGES   | 1.1292170 | 0.246181436 | 0.307726795 |
| BGLAP   | 0.9723532 | 0.250170630 | 0.309350779 |
| CHMP1A  | 1.0491821 | 0.255239851 | 0.312261520 |
| NFE2L3  | 1.0935953 | 0.270272637 | 0.323863520 |
| USF2    | 0.9774063 | 0.270355634 | 0.323863520 |
| SCD     | 1.1096228 | 0.300996748 | 0.356851815 |
| HHIP    | 0.9724626 | 0.340046766 | 0.399034470 |
| JUN     | 1.0950054 | 0.361011260 | 0.419356514 |
| DMTF1   | 1.0370924 | 0.382099813 | 0.439414785 |
| MX1     | 1.0929092 | 0.416318492 | 0.474026005 |
| ADORA2B | 1.0739785 | 0.435365075 | 0.490852780 |

|        |           |             |             |
|--------|-----------|-------------|-------------|
| GFRA1  | 0.9830053 | 0.451584723 | 0.504196535 |
| C3     | 1.0170307 | 0.472762539 | 0.519935773 |
| JUND   | 0.9690746 | 0.474723967 | 0.519935773 |
| ABI3BP | 1.0409124 | 0.485382936 | 0.526594695 |
| TJAP1  | 0.9727566 | 0.491806027 | 0.528576571 |
| VEGFA  | 0.9632603 | 0.515371387 | 0.548775088 |
| VDR    | 1.0227873 | 0.578790279 | 0.608510930 |
| MED20  | 1.0201096 | 0.582053933 | 0.608510930 |
| CLCA2  | 1.0942259 | 0.689413382 | 0.714257108 |
| YTHDF1 | 1.0057187 | 0.874628424 | 0.898055971 |
| NTRK2  | 1.0020352 | 0.921898242 | 0.938215025 |
| NPR3   | 1.0014968 | 0.942467891 | 0.944931823 |
| RRP1   | 0.9986337 | 0.944931823 | 0.944931823 |

**Supplementary Table S11. Coefficients for MIBCs *vs* NMIBCs classification using FOSL1 signature in GSE32894 dataset. Scaled coefficients reports the relative importance (magnitude) of coefficients on absolute scale \*Genes with more stable selection path.**

|          | Coefficients (scaled) | Coefficients (value) |
|----------|-----------------------|----------------------|
| KCNIP1*  | 100.00                | 0.53                 |
| CHML     | 54.30                 | 0.29                 |
| NTRK2*   | 53.39                 | -0.28                |
| BIRC5*   | 52.20                 | 0.28                 |
| MMP2     | 46.59                 | 0.25                 |
| MTDH*    | 37.38                 | 0.120                |
| DMTF1*   | 34.47                 | 0.18                 |
| PLCD4    | 31.53                 | 0.17                 |
| EP300    | 30.11                 | -0.17                |
| EZH2     | 29.30                 | 0.15                 |
| VEGFB    | 26.85                 | 0.14                 |
| NOS3     | 26.68                 | 0.14                 |
| PPP2R3A  | 24.87                 | 0.13                 |
| FOXO1    | 24.10                 | 0.13                 |
| PLAUR*   | 23.60                 | 0.12                 |
| VCAN*    | 21.92                 | 0.12                 |
| CLCF1    | 21.25                 | 0.11                 |
| FEN1     | 18.58                 | 0.10                 |
| CHMP1A   | 18.39                 | 0.10                 |
| AURKB    | 17.31                 | 0.09                 |
| MCM10    | 16.95                 | 0.09                 |
| COL1A1   | 16.92                 | 0.09                 |
| COL1A2   | 16.60                 | 0.09                 |
| PADI2    | 16.56                 | -0.09                |
| SP1      | 16.14                 | -0.09                |
| MCM2     | 12.38                 | 0.07                 |
| CCNA2    | 11.92                 | 0.06                 |
| MED20    | 11.90                 | 0.06                 |
| IL1RAP   | 10.03                 | 0.05                 |
| H2AFZ    | 9.83                  | 0.05                 |
| RGS5     | 9.76                  | -0.05                |
| IUNB     | 9.76                  | -0.05                |
| MX1*     | 9.58                  | -0.05                |
| PLAU     | 8.99                  | 0.05                 |
| SERPINE1 | 8.70                  | 0.05                 |
| ABHD11   | 8.62                  | -0.05                |
| IFI30    | 8.41                  | 0.04                 |
| PLEKHA6  | 8.10                  | -0.04                |

|          |      |         |
|----------|------|---------|
| ITGB4    | 7.88 | -0.04   |
| CXCL8    | 7.84 | 0.04    |
| VEGFC    | 7.07 | 0.04    |
| CCL20    | 6.43 | 0.03    |
| DLC1     | 6.35 | -0.03   |
| SRGN     | 5.69 | 0.03    |
| MMP9     | 5.60 | 0.030   |
| NEATC3   | 5.24 | 0.028   |
| VDR      | 4.80 | 0.025   |
| CCND1    | 4.09 | -0.022  |
| IL7R     | 4.01 | 0.021   |
| HMOX1    | 3.42 | 0.018   |
| SERPINE2 | 3.12 | 0.016   |
| ADGRG6   | 2.71 | -0.014  |
| PAICS    | 2.55 | 0.013   |
| CCL2     | 2.32 | 0.012   |
| CENPM    | 2.05 | 0.011   |
| ZEB2     | 1.82 | 0.0096  |
| LIF      | 1.72 | 0.0090  |
| COL7A1   | 1.27 | 0.0067  |
| MMP10    | 1.22 | -0.0064 |
| PTGES    | 0.90 | 0.0047  |
| GDF15    | 0.60 | -0.0032 |
| TIMP3    | 0.51 | -0.0027 |
| MGP      | 0.06 | 0.0003  |

**Supplementary Table S12. IHC and western blotting antibodies.**

| <b>Antibody</b> | <b>Clone</b> | <b>Isotype</b> | <b>Company</b>           | <b>Dilution</b>      |
|-----------------|--------------|----------------|--------------------------|----------------------|
| Actin           | polyclonal   | Rabbit         | Sigma-Aldrich            | 1:1000               |
| CD3             | LN10         | Mouse IgG1     | Leica Biosystems         | 1:100                |
| CD44            | DF1485       | Mouse IgG2a    | Thermo Fisher Scientific | 1:200                |
| CD66b           | G10F5        | Mouse IgM      | Biolegend                | 1:200                |
| CD163           | 10D6         | Mouse IgG1     | Thermo Fisher Scientific | 1:50                 |
| CK 5/6          | D5/16B4      | Mouse IgG1     | Thermo Fisher Scientific | 1:100                |
| CK 14           | LL002        | Mouse IgG3     | Leica Biosystems         | 1:50                 |
| CK 20           | Ks20.8       | Mouse IgG2a    | Leica Biosystems         | 1:50                 |
| FOSL1 (FRA-1)   | C-12         | Mouse IgG1     | Santa Cruz               | 1:1000 WB-1:80 IHC   |
| MYC             | Y69          | Rabbit         | Abcam                    | 1:10000 WB- 1:75 IHC |
| pSTAT3 (Tyr705) | D3A7         | Rabbit IgG     | Cell Signaling           | 1:1000 WB- 1:120 IHC |
| Sma             | 1A4(asm-     | mouse IgG2a    | Thermo Fisher Scientific | 1:100                |
| STAT3           | 84           | Mouse IgG      | BD Biosciences           | 1:2500               |
| UPK2            | BC21         | Mouse IgG1     | Biocare Medical          | 1:50                 |
| Isotype control | DA1E         | Rabbit IgG     | Cell Signaling           | 1:2500               |
| Isotype control | 11711        | Mouse IgG1     | R&D                      | 1:400                |

**WB= western blotting; IHC= immunohistochemistry**
